# Supplementary figures and images for: The Friction Properties of Firebrat Scales
Source: Preprints.org preprint supplement (doi:10.20944/preprints201809.0159.v1), 2018-09-10

# Supplementary material

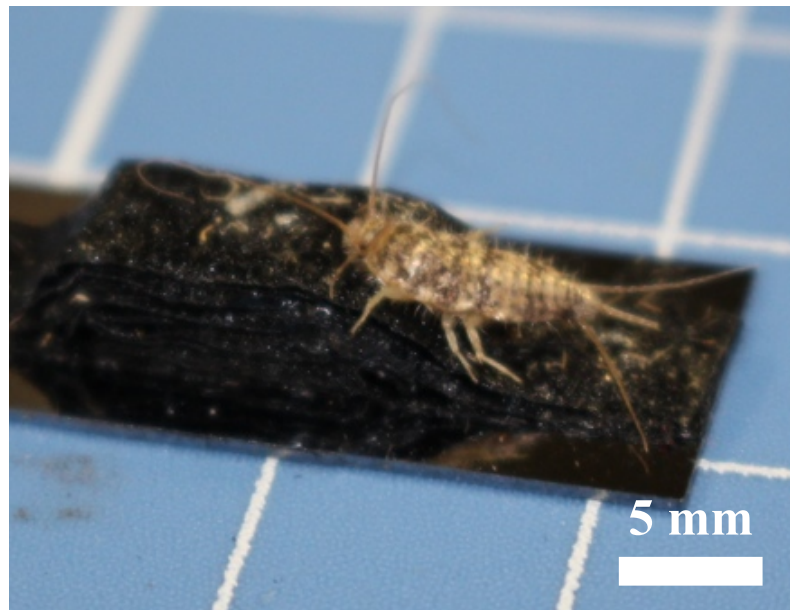

**Fig. S1. (Hirai)**

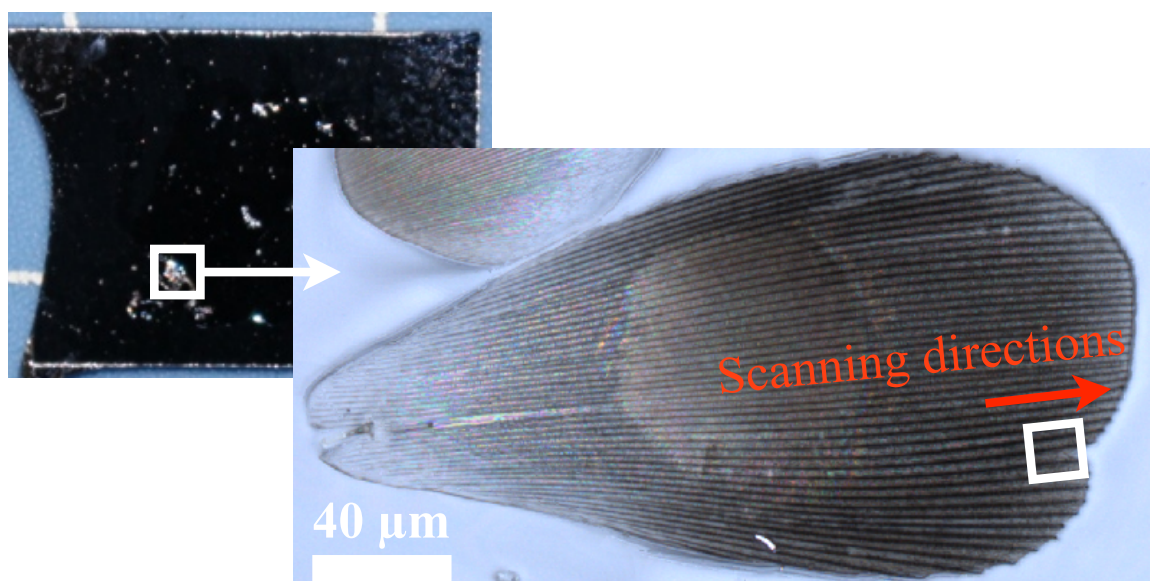

**Fig. S2. (Hirai)**

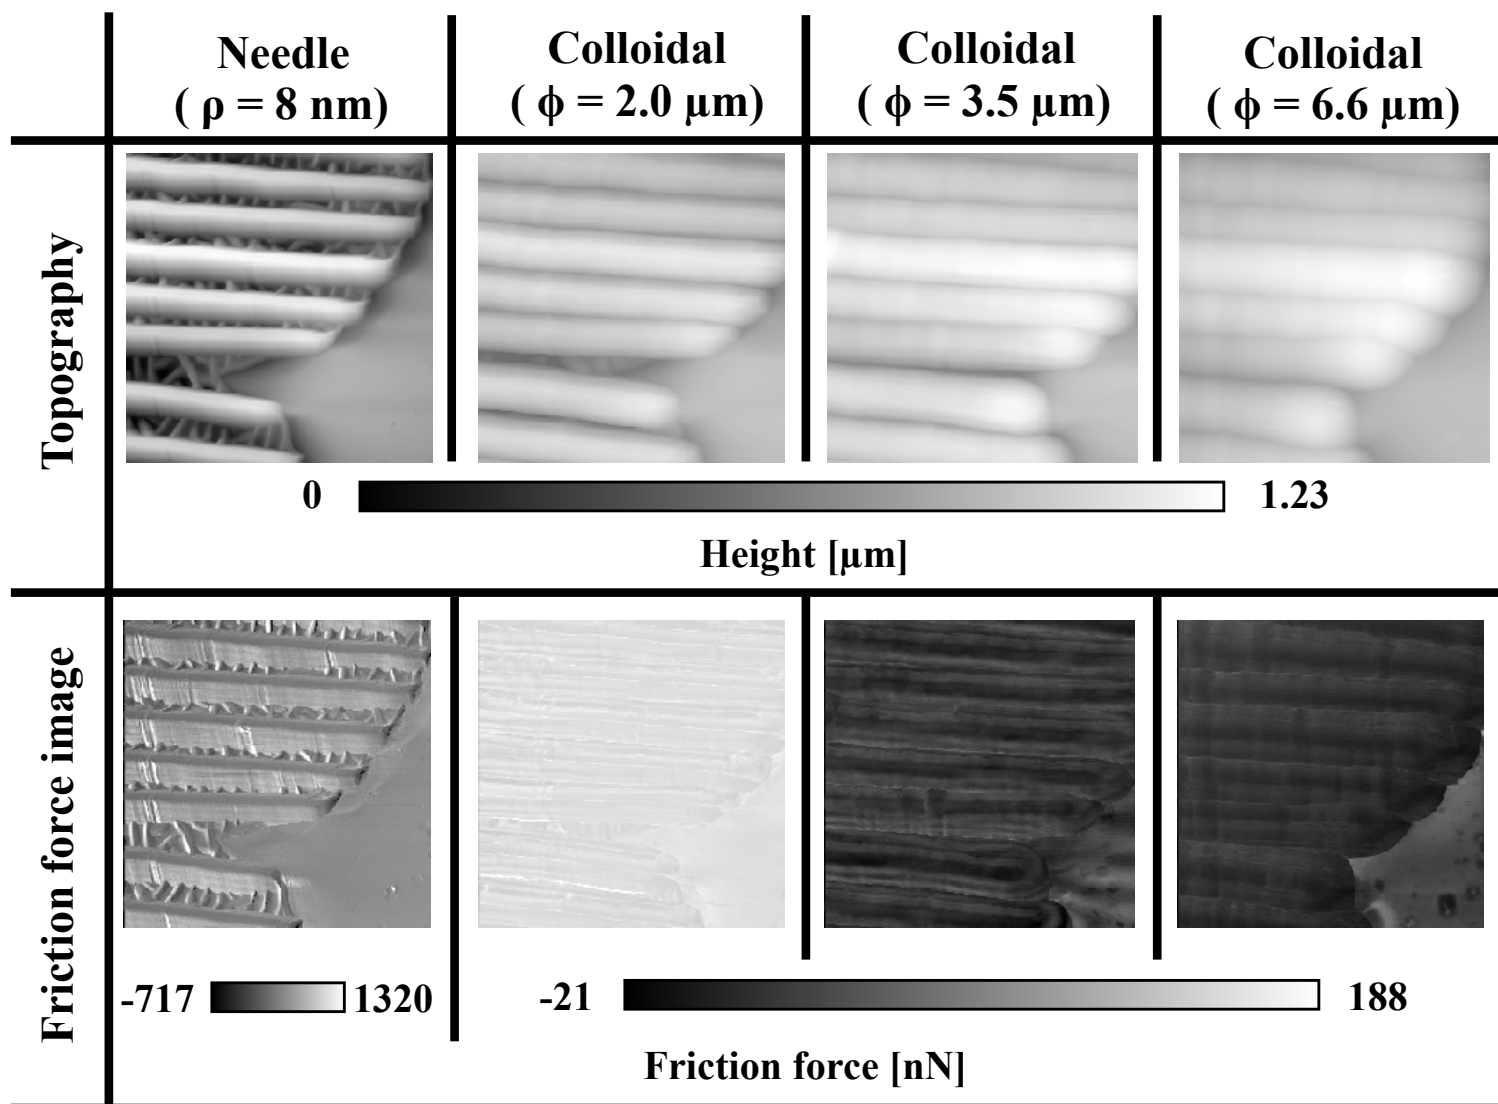

**Fig. S3. (Hirai)**

Supplement: Supplementary file 1 [file supplementary]
